# Supplementary material for: Epigenetic priming by Dppa2 and 4 in pluripotency facilitates multi-lineage commitment
Source: Springer Nature journal article supplement (doi:10.1038/s41594-020-0443-3), 2020-06-22
Supplement: 41594_2020_443_MOESM1_ESM.pdf [file 41594_2020_443_MOESM1_ESM.pdf]

## Reporting Summary

Nature Research wishes to improve the reproducibility of the work that we publish. This form provides structure for consistency and transparency in reporting. For further information on Nature Research policies, see [Authors & Referees](#) and the [Editorial Policy Checklist](#).

### Statistics

For all statistical analyses, confirm that the following items are present in the figure legend, table legend, main text, or Methods section.

- |     |           |
|-----|-----------|
| n/a | Confirmed |
|-----|-----------|
- The exact sample size ( $n$ ) for each experimental group/condition, given as a discrete number and unit of measurement
  - A statement on whether measurements were taken from distinct samples or whether the same sample was measured repeatedly
  - The statistical test(s) used AND whether they are one- or two-sided  
*Only common tests should be described solely by name; describe more complex techniques in the Methods section.*
  - A description of all covariates tested
  - A description of any assumptions or corrections, such as tests of normality and adjustment for multiple comparisons
  - A full description of the statistical parameters including central tendency (e.g. means) or other basic estimates (e.g. regression coefficient) AND variation (e.g. standard deviation) or associated estimates of uncertainty (e.g. confidence intervals)
  - For null hypothesis testing, the test statistic (e.g.  $F$ ,  $t$ ,  $r$ ) with confidence intervals, effect sizes, degrees of freedom and  $P$  value noted  
*Give  $P$  values as exact values whenever suitable.*
  - For Bayesian analysis, information on the choice of priors and Markov chain Monte Carlo settings
  - For hierarchical and complex designs, identification of the appropriate level for tests and full reporting of outcomes
  - Estimates of effect sizes (e.g. Cohen's  $d$ , Pearson's  $r$ ), indicating how they were calculated

*Our web collection on [statistics for biologists](#) contains articles on many of the points above.*

### Software and code

Policy information about [availability of computer code](#)

Data collection

No software was used to collect data in this study.

Data analysis

RNA-seq raw FastQ data were trimmed with Trim Galore (version 0.4.4 for EB RNA-seq, v0.5.0\_dev for Dppa-GFP overexpression lines)  
RNA-seq trimmed reads were mapped with Hisat2 (version 2.1.0 for EB RNA-seq data and for Dppa-GFP overexpression lines)  
ChIP-seq and ATAC-seq raw FastQ data were trimmed with Trim Galore (version v0.6.1) and mapped using Bowtie 2 (v 2.3.2)  
Bisulfite-seq data was trimmed using Trim Galore (version 0.4.4) and aligned using Bismark (v.0.18.2)  
Aligned data was analysed using seqmonk (<http://www.bioinformatics.babraham.ac.uk/projects/seqmonk>, v 1.46.0).  
Graphing and statistics were performed using Excel, RStudio (v.1.2) or Graphpad Prism 8.  
qPLEX-RIME data was processed using Proteome Discoverer (Thermo Scientific v 2.1) and further processing, normalisation and statistical analysis was performed using qPLEXanalyser within R (Papachristou et al., 2018)

For manuscripts utilizing custom algorithms or software that are central to the research but not yet described in published literature, software must be made available to editors/reviewers. We strongly encourage code deposition in a community repository (e.g. GitHub). See the Nature Research [guidelines for submitting code & software](#) for further information.

### Data

Policy information about [availability of data](#)

All manuscripts must include a [data availability statement](#). This statement should provide the following information, where applicable:

- Accession codes, unique identifiers, or web links for publicly available datasets
- A list of figures that have associated raw data
- A description of any restrictions on data availability

All sequencing data generated in this study has been submitted to GEO under accession number GSE135841. The mass spectrometry proteomics data have been deposited to the ProteomeXchange Consortium via the PRIDE 45 partner repository with the data set identifier PXD014981.

## Field-specific reporting

Please select the one below that is the best fit for your research. If you are not sure, read the appropriate sections before making your selection.

- Life sciences       Behavioural & social sciences       Ecological, evolutionary & environmental sciences

For a reference copy of the document with all sections, see [nature.com/documents/nr-reporting-summary-flat.pdf](https://www.nature.com/documents/nr-reporting-summary-flat.pdf)

## Life sciences study design

All studies must disclose on these points even when the disclosure is negative.

- Sample size
- Data exclusions
- Replication
- Randomization
- Blinding

## Reporting for specific materials, systems and methods

We require information from authors about some types of materials, experimental systems and methods used in many studies. Here, indicate whether each material, system or method listed is relevant to your study. If you are not sure if a list item applies to your research, read the appropriate section before selecting a response.

### Materials & experimental systems

- | n/a                                 | Included in the study                                     |
|-------------------------------------|-----------------------------------------------------------|
| <input type="checkbox"/>            | <input checked="" type="checkbox"/> Antibodies            |
| <input type="checkbox"/>            | <input checked="" type="checkbox"/> Eukaryotic cell lines |
| <input checked="" type="checkbox"/> | <input type="checkbox"/> Palaeontology                    |
| <input checked="" type="checkbox"/> | <input type="checkbox"/> Animals and other organisms      |
| <input checked="" type="checkbox"/> | <input type="checkbox"/> Human research participants      |
| <input checked="" type="checkbox"/> | <input type="checkbox"/> Clinical data                    |

### Methods

- | n/a                                 | Included in the study                           |
|-------------------------------------|-------------------------------------------------|
| <input type="checkbox"/>            | <input checked="" type="checkbox"/> ChIP-seq    |
| <input checked="" type="checkbox"/> | <input type="checkbox"/> Flow cytometry         |
| <input checked="" type="checkbox"/> | <input type="checkbox"/> MRI-based neuroimaging |

## Antibodies

Antibodies used

anti- $\beta$ -Actin Abcam ab6276 (western blotting)  
 anti-Ash2l Bethyl A300-489A (western blotting, ChIP-seq)  
 anti-Dmap CST 13326 (western blotting)  
 anti-Dppa2 Millipore MAB4356 (western blotting)  
 anti-Dppa4 Santa Cruz sc-74614 (western blotting)  
 anti-Ezh2 CST D2C9 (western blotting, ChIP-seq)  
 anti-H2A.Z Abcam ab4174 (western blotting, ChIP-seq)  
 anti-H3 Abcam ab1791 (western blotting)  
 anti-H3K4me3 Diagenode C15410003 (western blotting)  
 anti-H3K27me3 Millipore 07-449 (western blotting)  
 anti-Hsp90 Abcam ab13492 (western blotting)  
 anti-Mll2 CST D6X2E #63735 (western blotting)  
 anti-Ruvbl1 Abcam ab51500 (western blotting)  
 anti-Suz12 CST D39F6 (western blotting)  
 anti-mouse HRP – Santa Cruz sc-2005 (western blotting)  
 anti-rabbit HRP – Biorad 170-6515 (western blotting)  
 anti-Dppa4 R&D AF3730 (IP)  
 anti-GFP Abcam ab290 (qPLEX-RIME)  
 anti-Oct4 Abcam ab19857 (immunofluorescence)  
 anti-Nanog Abcam ab80892 (immunofluorescence)  
 anti-Sox2 Abcam ab97959 (immunofluorescence)  
 anti-H3K4me3 Abcam ab8580 (ChIP-seq)  
 anti-H3K27me3 Active Motif AM39155 (ChIP-seq)  
 anti-Ring1b CST D22F2 (ChIP-seq)

## Validation

anti- $\beta$ -Actin Abcam ab6276 - KO validated, reacts with Mouse, validated to work for western blotting (WB)  
 anti-Ash2l Bethyl A300-489A - Validated for WB and ChIP. Immunogen is human but 100% sequence identity with mouse.  
 anti-Dmap CST 13326 - Validated for WB. Reacts with mouse antigen.  
 anti-Dppa2 Millipore MAB4356 - This Anti-DPPA-2 Antibody, clone 6C1.2 is validated for use in WB for the detection of DPPA-2.  
 anti-Dppa4 Santa Cruz sc-74614 (WB) - no longer available.  
 anti-Ezh2 CST D2C9 - validated to work for WB and ChIP-seq. Cited in 208 papers.  
 anti-H2A.Z Abcam ab4174 - ChIP-grade antibody tested for ChIP-seq and WB. Cited in 114 papers.  
 anti-H3 Abcam ab1791 - ChIP-grade antibody tested for ChIP-seq and WB. Cited in 2898 papers.  
 anti-H3K4me3 Diagenode C15410003 -WB validation was performed by the manufacturer using cell extracts and recombinant protein.  
 anti-H3K27me3 Millipore 07-449 - validated by manufacturer using acid extracted proteins from HeLa cells.  
 anti-Hsp90 Abcam ab13492 - validated for WB and cited in 55 papers.  
 anti-Mll2 CST D6X2E #63735 - validated for WB by manufacturer using cell lysates from various cell types.  
 anti-Ruvbl1 Abcam ab51500 - validated for WB by manufacturer.  
 anti-Suz12 CST D39F6 - validated for WB by manufacturer using cell lysates from various cell types. Cited by 92 papers.  
 anti-mouse HRP – Santa Cruz sc-2005 - validated by manufacturer.  
 anti-rabbit HRP – Biorad 170-6515 - validated by manufacturer.  
 anti-Dppa4 R&D AF3730 - Not validated for IP previously but used in direct ELISAs and WBs. Used successfully for ChIP in two previous publications.  
 anti-GFP Abcam ab290 - Tested by manufacturer in ChIP assays (similar to RIME) and cited by 1996 papers.  
 anti-Oct4 Abcam ab19857 - Tested by manufacturer in immunofluorescence assays.  
 anti-Nanog Abcam ab80892 - Tested by manufacturer in immunofluorescence assays.  
 anti-Sox2 Abcam ab97959 - Tested by manufacturer in immunofluorescence assays.  
 anti-H3K4me3 Abcam ab8580 - Tested by manufacturer in ChIP assays and cited by 1383 papers.  
 anti-H3K27me3 Active Motif AM39155 - Used in a number of papers for ChIP.  
 anti-Ring1b CST D22F2 - Tested by manufacturer in ChIP assays and used in 5 publications for ChIP.

## Eukaryotic cell lines

Policy information about [cell lines](#)

Cell line source(s)

E14 cells were acquired from the Babraham Institute Gene Targeting Facility.

Authentication

Cell lines used were not authenticated.

Mycoplasma contamination

Cell lines tested negative for mycoplasma contamination.

Commonly misidentified lines  
(See [ICLAC](#) register)

We did not use any cells listed on the ICLAC register of commonly misidentified lines.

## ChIP-seq

## Data deposition

 Confirm that both raw and final processed data have been deposited in a public database such as [GEO](#). Confirm that you have deposited or provided access to graph files (e.g. BED files) for the called peaks.

Data access links

*May remain private before publication.*

<https://www.ncbi.nlm.nih.gov/geo/query/acc.cgi?acc=GSE135841>  
 token: upyzaguudjenzox (to be released)

Files in database submission

The following lists the ChIP-seq samples included in the submission. RNA-seq samples generated as part of the study are also included in this submission.

GSM4035136 EZH2\_43  
 GSM4035137 EZH2\_58  
 GSM4035138 H2AZ\_43  
 GSM4035139 H2AZ\_58  
 GSM4035140 H3K27me3\_36  
 GSM4035141 H3K27me3\_53  
 GSM4035142 H3K27me3\_57  
 GSM4035143 H3K27me3\_58  
 GSM4035144 H3K27me3\_MC3  
 GSM4035145 H3K4me3\_36  
 GSM4035146 H3K4me3\_43  
 GSM4035147 H3K4me3\_53  
 GSM4035148 H3K4me3\_57  
 GSM4035149 H3K4me3\_58  
 GSM4035150 H3K4me3\_MC3  
 GSM4035151 Input\_36  
 GSM4035152 Input\_43\_2  
 GSM4035153 Input\_43  
 GSM4035154 Input\_57

GSM4035155 Input\_58\_2  
 GSM4035156 Input\_58  
 GSM4035157 RING1B\_43  
 GSM4035158 RING1B\_58  
 GSM4035159 Ash2L\_43  
 GSM4035160 Ash2L\_58  
 GSM4430482 shRNA\_Dppa4\_plusDox\_B  
 GSM4430483 shRNA\_Dppa2\_plusDox\_C  
 GSM4430484 shRNA\_Dppa2\_noDox\_B  
 GSM4430485 shRNA\_Dppa2\_noDox\_C  
 GSM4430486 shRNA\_Dppa2\_plusDox\_B  
 GSM4430487 shRNA\_Dppa4\_recovery\_C  
 GSM4430488 shRNA\_Dppa2\_recovery\_C  
 GSM4430489 shRNA\_Dppa4\_recovery\_B  
 GSM4430490 shRNA\_Dppa4\_plusDox\_C  
 GSM4430492 shRNA\_Dppa4\_noDox\_C  
 GSM4430496 shRNA\_Dppa4\_noDox\_B  
 GSM4430498 shRNA\_Dppa2\_recovery\_B  
 GSM4430500 input\_shRNA\_Dppa2\_noDox  
 GSM4430501 input\_shRNA\_Dppa2\_recovery  
 GSM4430502 input\_shRNA\_Dppa2\_plusDox  
 GSM4430503 input\_shRNA\_Dppa4\_noDox  
 GSM4430504 input\_shRNA\_Dppa4\_recovery  
 GSM4430505 input\_shRNA\_Dppa4\_plusDox  
 GSM4430506 H3K27me3\_ChIP\_shRNA\_Dppa2\_noDox\_1  
 GSM4430507 H3K27me3\_ChIP\_shRNA\_Dppa2\_recovery\_1  
 GSM4430508 H3K27me3\_ChIP\_shRNA\_Dppa2\_plusDox\_1  
 GSM4430509 H3K27me3\_ChIP\_shRNA\_Dppa2\_noDox\_2  
 GSM4430510 H3K27me3\_ChIP\_shRNA\_Dppa2\_recovery\_2  
 GSM4430511 H3K27me3\_ChIP\_shRNA\_Dppa2\_plusDox\_2  
 GSM4430512 H3K27me3\_ChIP\_shRNA\_Dppa2\_noDox\_3  
 GSM4430513 H3K27me3\_ChIP\_shRNA\_Dppa2\_recovery\_3  
 GSM4430514 H3K27me3\_ChIP\_shRNA\_Dppa2\_plusDox\_3  
 GSM4430515 H3K27me3\_ChIP\_shRNA\_Dppa4\_noDox\_1  
 GSM4430516 H3K27me3\_ChIP\_shRNA\_Dppa4\_recovery\_1  
 GSM4430517 H3K27me3\_ChIP\_shRNA\_Dppa4\_plusDox\_1  
 GSM4430518 H3K27me3\_ChIP\_shRNA\_Dppa4\_noDox\_2  
 GSM4430519 H3K27me3\_ChIP\_shRNA\_Dppa4\_recovery\_2  
 GSM4430520 H3K27me3\_ChIP\_shRNA\_Dppa4\_plusDox\_2  
 GSM4430521 H3K27me3\_ChIP\_shRNA\_Dppa4\_noDox\_3  
 GSM4430522 H3K27me3\_ChIP\_shRNA\_Dppa4\_recovery\_3  
 GSM4430523 H3K27me3\_ChIP\_shRNA\_Dppa4\_plusDox\_3  
 GSM4430524 H3K4me3\_ChIP\_shRNA\_Dppa2\_noDox\_1  
 GSM4430525 H3K4me3\_ChIP\_shRNA\_Dppa2\_recovery\_1  
 GSM4430526 H3K4me3\_ChIP\_shRNA\_Dppa2\_plusDox\_1  
 GSM4430527 H3K4me3\_ChIP\_shRNA\_Dppa2\_noDox\_2  
 GSM4430528 H3K4me3\_ChIP\_shRNA\_Dppa2\_recovery\_2  
 GSM4430529 H3K4me3\_ChIP\_shRNA\_Dppa2\_plusDox\_2  
 GSM4430530 H3K4me3\_ChIP\_shRNA\_Dppa2\_noDox\_3  
 GSM4430531 H3K4me3\_ChIP\_shRNA\_Dppa2\_recovery\_3  
 GSM4430532 H3K4me3\_ChIP\_shRNA\_Dppa2\_plusDox\_3  
 GSM4430533 H3K4me3\_ChIP\_shRNA\_Dppa4\_noDox\_1  
 GSM4430534 H3K4me3\_ChIP\_shRNA\_Dppa4\_recovery\_1  
 GSM4430535 H3K4me3\_ChIP\_shRNA\_Dppa4\_plusDox\_1  
 GSM4430536 H3K4me3\_ChIP\_shRNA\_Dppa4\_noDox\_2  
 GSM4430537 H3K4me3\_ChIP\_shRNA\_Dppa4\_recovery\_2  
 GSM4430538 H3K4me3\_ChIP\_shRNA\_Dppa4\_plusDox\_2  
 GSM4430539 H3K4me3\_ChIP\_shRNA\_Dppa4\_noDox\_3  
 GSM4430540 H3K4me3\_ChIP\_shRNA\_Dppa4\_recovery\_3  
 GSM4430541 H3K4me3\_ChIP\_shRNA\_Dppa4\_plusDox\_3

Genome browser session  
 (e.g. [UCSC](#))

No longer applicable.

## Methodology

Replicates

H3K27me3 and H3K4me3 ChIP-seq samples were prepared in biological triplicate (from three independent Dppa2,4 double knockout and wild type clones).  
 For recovery experiments (cells expressing inducible short hairpins against Dppa2 or Dppa4) ChIP-seq for H3K4me3 and H3K27me3 were generated in triplicate where each of the replicates were generated from the same population of cells but separated by at least 1 passage.  
 The following ChIP samples were prepared from single WT and DKO clones: EZH2, H2AZ, RING1B, ASH2L.

Sequencing depth

ChIP-seq for H3K4me3, H3K27me3, Ring1B, Ash2L, Ezh2 and H2A.Z in WT and Dppa2,4 DKO cells (numbering refers to clone number) - 50bp single-end

## Sample Name, Total Reads (Million), % Aligned

EZH2\_43 (DKO), 20.1, 96.60%  
 EZH2\_58 (WT), 20.1, 96.50%  
 H2AZ\_43 (DKO), 21.1, 97.20%  
 H2AZ\_58 (WT), 21, 97.30%  
 H3K27me3\_36 (DKO), 25.8, 95.80%  
 H3K27me3\_43 (DKO), 28.3, 97.70%  
 H3K27me3\_53 (DKO), 26.8, 95.60%  
 H3K27me3\_57 (WT), 23.2, 96.00%  
 H3K27me3\_58 (WT), 25.1, 94.60%  
 H3K27me3\_MC3 (WT), 28.3, 95.10%  
 H3K4me3\_36 (DKO), 32.7, 96.20%  
 H3K4me3\_43 (DKO), 29.9, 95.80%  
 H3K4me3\_53 (DKO), 29.2, 96.20%  
 H3K4me3\_57 (WT), 25.2, 95.80%  
 H3K4me3\_58 (WT), 29.6, 95.20%  
 H3K4me3\_MC3 (WT), 29.6, 94.00%  
 Input\_36 (DKO), 25.1, 98.00%  
 Input\_43 (DKO), 18.7, 97.90%  
 Input\_57 (WT), 22.3, 98.00%  
 Input\_58 (WT), 18.8, 97.90%  
 RING1B\_43 (DKO), 21.8, 97.10%  
 RING1B\_58 (WT), 21.8, 97.00%  
 ASH2L\_43 (DKO), 29.0, 87.7%  
 ASH2L\_58 (WT), 24.6, 91.5%

ChIP-seq for H3K4me3 and H3K27me3 in shDppa2,4 cells untreated (-), treated with dox (+) or treated with dox and allowed to recover (+ -). 2.2 and 4.1 are short hairpins against Dppa2 and Dppa4 respectively. The numbering in each name refers to the replicate number - 50bp single-end

## Sample Name, Total Reads (Million), % Aligned

Input\_2.2\_+\_-\_3, 8.2, 97.60%  
 Input\_2.2\_+\_3, 8.6, 97.60%  
 Input\_2.2\_-\_3, 14.3, 97.60%  
 Input\_4.1\_+\_-\_3, 9.4, 97.60%  
 Input\_4.1\_+\_3, 8.7, 97.50%  
 Input\_4.1\_-\_3, 9.7, 97.70%  
 H3K27me3\_2.2\_+\_-\_1, 16.1, 95.10%  
 H3K27me3\_2.2\_+\_-\_2, 11.8, 96.30%  
 H3K27me3\_2.2\_+\_-\_3, 7.3, 96.80%  
 H3K27me3\_2.2\_+\_1, 13.7, 95.10%  
 H3K27me3\_2.2\_+\_2, 9.1, 96.80%  
 H3K27me3\_2.2\_+\_3, 8.7, 97.20%  
 H3K27me3\_2.2\_-\_1, 13.2, 96.70%  
 H3K27me3\_2.2\_-\_2, 10.4, 96.50%  
 H3K27me3\_2.2\_-\_3, 10.1, 96.30%  
 H3K27me3\_4.1\_+\_-\_1, 11.3, 96.90%  
 H3K27me3\_4.1\_+\_-\_2, 10, 96.00%  
 H3K27me3\_4.1\_+\_-\_3, 11.8, 97.00%  
 H3K27me3\_4.1\_+\_1, 13.7, 95.90%  
 H3K27me3\_4.1\_+\_2, 13.5, 95.70%  
 H3K27me3\_4.1\_+\_3, 9.2, 97.00%  
 H3K27me3\_4.1\_-\_1, 12.8, 95.20%  
 H3K27me3\_4.1\_-\_2, 12.8, 96.40%  
 H3K27me3\_4.1\_-\_3, 7.4, 97.00%  
 H3K4me3\_2.2\_+\_-\_1, 8.5, 98.10%  
 H3K4me3\_2.2\_+\_-\_2, 12.3, 98.10%  
 H3K4me3\_2.2\_+\_-\_3, 9.3, 98.20%  
 H3K4me3\_2.2\_+\_1, 10.5, 98.00%  
 H3K4me3\_2.2\_+\_2, 9, 98.20%  
 H3K4me3\_2.2\_+\_3, 8.8, 98.20%  
 H3K4me3\_2.2\_-\_1, 10.6, 98.00%  
 H3K4me3\_2.2\_-\_2, 8.5, 98.10%  
 H3K4me3\_2.2\_-\_3, 8.8, 98.20%  
 H3K4me3\_4.1\_+\_-\_1, 9.5, 98.00%  
 H3K4me3\_4.1\_+\_-\_2, 8.4, 98.20%  
 H3K4me3\_4.1\_+\_-\_3, 11.9, 98.20%  
 H3K4me3\_4.1\_+\_1, 8.4, 98.10%  
 H3K4me3\_4.1\_+\_2, 9.2, 98.20%  
 H3K4me3\_4.1\_+\_3, 12.3, 98.20%  
 H3K4me3\_4.1\_-\_1, 8.6, 98.20%  
 H3K4me3\_4.1\_-\_2, 9.4, 98.10%  
 H3K4me3\_4.1\_-\_3, 9.6, 98.30%

|                         |                                                                                                                                                                                                                                                                                                                                                                                                                                                                  |
|-------------------------|------------------------------------------------------------------------------------------------------------------------------------------------------------------------------------------------------------------------------------------------------------------------------------------------------------------------------------------------------------------------------------------------------------------------------------------------------------------|
| Antibodies              | anti-H3K4me3 Abcam ab8580<br>anti-H3K27me3 Active Motif AM39155<br>anti-Ring1b CST D22F2<br>anti-Ash2l Bethyl A300-489A<br>anti-Ezh2 CST D2C9<br>anti-H2A.Z Abcam ab4174                                                                                                                                                                                                                                                                                         |
| Peak calling parameters | ChIP-seq Raw FastQ data were trimmed with Trim Galore v0.6.1 and aligned to mouse GRCm38 genome using Bowtie 2 v 2.3.2. Peak calling was performed on Dppa2 and 4 ChIP seq data from Hernandez et al. (2018) using the MACS (Genome Biology 2008,9:R137) within SeqMonk (v 1.46.0) and a p-value cutoff of 1.0E-5. Peak calling was not performed on other ChIP-seq data - these were instead quantitated (as log2 RPM) across previously defined Dppa2,4 peaks. |
| Data quality            | Raw FastQ files were trimmed aligned and de-duplicated. Wiggle plots for each sample were generated and WT profiles were compared to published data. Peak calling was not usually performed - data was quantitated (as log2 RPM) across promoters of interest.                                                                                                                                                                                                   |
| Software                | ChIP-seq Raw FastQ data were trimmed with Trim Galore v0.6.1 and aligned to mouse GRCm38 genome using Bowtie 2 v 2.3.2. All downstream data processing was performed using SeqMonk software ( <a href="https://www.bioinformatics.babraham.ac.uk/projects/seqmonk/">https://www.bioinformatics.babraham.ac.uk/projects/seqmonk/</a> ).                                                                                                                           |
