# Supplementary material for: Epigenetic priming by Dppa2 and 4 in pluripotency facilitates multi-lineage commitment
Source: Springer Nature journal article supplement (doi:10.1038/s41594-020-0443-3), 2020-06-22
Supplement: 41594_2020_443_MOESM2_ESM.pdf [file 41594_2020_443_MOESM2_ESM.pdf]

## Peer Review Information

---

**Journal:** Nature Structural and Molecular Biology

**Manuscript Title:** Dppa2/4 target chromatin bivalency enabling multi-lineage commitment

**Corresponding author name(s):** Prof. Wolf Reik

### Editorial Notes:

**Redactions – transferred manuscripts (mention of previous referee reports from elsewhere)** This manuscript has been previously reviewed at another journal. This document only contains reviewer comments, rebuttal and decision letters for versions considered at Nature Structural & Molecular Biology. Mentions of the other journal and of prior referee reports have been redacted.

**Redactions – published data** In addition, parts of this Peer Review File have been redacted as indicated to remove third-party material.

### Reviewer Comments & Decisions:

#### Decision Letter, first revision:

31st Mar 2020

Dear Wolf,

Thank you again for submitting your manuscript "Epigenetic priming by Dppa2/4 in pluripotency facilitates multi-lineage commitment". We have now received the comments (appended below) of the two referees who initially reviewed the study at [JOURNAL NAME REDACTED] and who also assessed this revision. You will see that both are positive and find the results convincing. In order to avoid multiple rounds of revision, I would like to ask you at this stage to provide a short point-by-point response to the comments of reviewer #1. You can send this information to me via e-mail. If necessary, we might briefly pass your response by the reviewer.

In addition, could you please send me a Word document of the manuscript main text (without figures) at your earliest convenience? We can then provide you with guidelines to prepare the final revision and reorganize the manuscript according to our editorial style and requirements; this should facilitate the next steps.

If you have any questions please do not hesitate to contact me.

With kind regards,  
Anke

Anke Sparmann, PhD  
Senior Editor, Nature Structural & Molecular Biology  
Nature Research  
ORCID ID 0000-0001-7695-2049

Reviewer #1 (Remarks to the Author):

The manuscript entitled "Epigenetic priming by Dppa2/4 in pluripotency facilitates multi-lineage commitment" by Eckersley-Maslin et al. demonstrates a role for Dppa2/4 (Developmental Pluripotency Associated 2/4) in establishing bivalency at select developmental genes. The authors show that removal of Dppa2/4 disturbs differentiation and results in a loss of bivalency at adequately termed "Dppa2/4-dependent" promoters, which are characterized by a reduced presence of H3K4me3 and low expression levels. This manuscript presents novel insights into chromatin biology and the results are very convincing. In addition, a large share of the observations of the authors are confirmed in an independent publication recently deposited on BiorXiv (<https://www.biorxiv.org/content/10.1101/2020.03.11.987701v1.full>). We provide a few suggestions that might further improve the manuscript.

General comment:

While the authors uncover a group of bivalent promoters that are sensitive to but not dependent on Dppa2/4, mechanistic insights into the biology of these promoters remains relatively unaddressed. This group of bivalent promoters appears to classify between Dppa2/4-dependent and -independent promoters, with regard to their biological behavior. It would be informative if the authors would explore or describe potential mechanisms underlying this distinction. This might be relevant given the fact that the machine learning algorithm presented in Figure 3 seems unable to accurately classify these promoters.

Minor comments:

- In general, wouldn't (epigenetic) priming result in faster, rather than slower, differentiation, of Dppa2/4 DKO ESCs? It might be useful if the authors could comment on this.
- Figure S1C – It would be informative to quantify the OCT4, NANOG and SOX2 signal. While we agree that the fluorescent signal of OCT4 and SOX2 appears to be similar between WT and DKO ESCs (in agreement with the RT-qPCR), NANOG seems a bit reduced in the DKO cells (in agreement with the RT-qPCR for NANOG, which might also extrapolate to all naïve markers). This is important as the absence of DPPA2/4 might result in a slight downregulation of naïve markers, which would extend on the manuscript title that dppa2/4 lead to not only epigenetic priming, but maybe in general priming of ESCs.
- Line 18/19 – Please specify the organism used in this study earlier on. It is not mentioned until the methods section which model organism is used.
- Line 67 – Please indicate that these are Dppa2/4 DKO cells.
- Line 100 – Please change this to "Fig 1F-G".

- Line 114 – Please change Wrd5 to Wdr5
- Line 143 – In figure 2D, Ring1B and Ezh2 appear to be increased for Dppa2/4-sensitive promoters, as opposed to unaltered. Please address this.
- Figure 2D – Indicate peak numbers in figure as peak numbers in figure 2C are very small
- Line 147 / Figure S3D - For the control IgG plot, there appear to be strong outliers for all genes. Certain other ChIPs also show outliers for some genes. As such, how reliable are these results?
- Line 206 – This requires some nuance. While it appears that Dppa2/4-sensitive genes do not reach the same expression levels in the Dppa2/4 DKO as in WT, there is a clear pattern of upregulation that mimics the WT situation. This pattern is not present for the Dppa2/4-dependent genes.
- Line 842 – The methods section regarding the machine learning is not very transparent. It also mentions training on random promoters, however no data regarding outcomes of this can be found in the manuscript.
- Line 875 / Figure S1B – Are the expression levels shown for WT and Dppa2/4 DKO cells averaged over all three clones, or from one clone that is representative for all three. This is unclear from the legend.
- Line 958 / Figure S5A – Please include an extra panel of box-whisker plots showing only Dppa2/4-sensitive genes.
- Line 983 / Figure S6A – Quantify the western blot signal relative to the housekeeping signal.

#### Reviewer #2 (Remarks to the Author):

The authors addressed most of the issues raised in the original review. Although there are some issues that could have been improved, and it is not entirely clear how much the new shRNA experiments are adding to the paper and to address the original 'novelty' question, the paper has been substantially improved and merits publication. With everything that's going on in the world at this point, I would refrain from sending the authors back to the bench for additional minor edits, and I would recommend publishing the paper at its current form.

#### Author Rebuttal, Response to Remaining Comments:

We thank the reviewers for their positive comments on the revised manuscript. We have addressed all the comments below in a point by point rebuttal and have incorporated the changes into the revised manuscript where appropriate.

#### Reviewer #1 (Remarks to the Author):

The manuscript entitled “Epigenetic priming by Dppa2/4 in pluripotency facilitates multi-lineage commitment” by Eckersley-Maslin et al. demonstrates a role for Dppa2/4 (Developmental Pluripotency Associated 2/4) in establishing bivalency at select developmental genes. The authors show that removal of Dppa2/4 disturbs differentiation and results in a loss of bivalency

at adequately termed “Dppa2/4-dependent” promoters, which are characterized by a reduced presence of H3K4me3 and low expression levels. This manuscript presents novel insights into chromatin biology and the results are very convincing. In addition, a large share of the observations of the authors are confirmed in an independent publication recently deposited on BiorXiv (<https://www.biorxiv.org/content/10.1101/2020.03.11.987701v1.full>). We provide a few suggestions that might further improve the manuscript.

#### **General comment:**

While the authors uncover a group of bivalent promoters that are sensitive to but not dependent on Dppa2/4, mechanistic insights into the biology of these promoters remains relatively unaddressed. This group of bivalent promoters appears to classify between Dppa2/4-dependent and -independent promoters, with regard to their biological behaviour. It would be informative if the authors would explore or describe potential mechanisms underlying this distinction. This might be relevant given the fact that the machine learning algorithm presented in Figure 3 seems unable to accurately classify these promoters.

In our discussion (line 289 onwards) we hypothesise that Dppa2/4-dependent promoters with low levels of H3K4me3 and elongating RNA Pol II require continuous targeting of Polycomb and COMPASS by Dppa2/4 to maintain their bivalent state. On the other hand, Dppa2/4-independent promoters have relatively high levels of expression and H3K4me3 and may be able to maintain bivalency in the absence of Dppa2/4 as these are reinforced by positive feedback loops. At Dppa2/4-sensitive genes the intermediate levels of H3K4me3 and transcription might result in stochastic changes and heterogeneity such that individual cells / promoters might either maintain H3K4me3 or fail to do, gaining DNA methylation as a result. Since our analyses are population based the signal is averaged such that Dppa2/4-sensitive genes appear to partially lose H3K4me3 and partially gain DNA methylation, whilst in reality the effect might be stronger in individual cells. We have expanded on our discussion to incorporate some of these points.

#### **Minor comments:**

- In general, wouldn't (epigenetic) priming result in faster, rather than slower, differentiation, of Dppa2/4 DKO ESCs? It might be useful if the authors could comment on this.

We find that there is a loss of epigenetic priming (bivalency) at a subset of developmentally important genes in Dppa2/4 DKO mESCs and we would therefore expect slower differentiation in these cells as relevant genes can no longer be upregulated efficiently. Epigenetic priming might lower the ‘activation barrier’ that needs to be overcome for a gene to be transcribed and Dppa2/4 knockout results in a higher activation barrier. Epigenetic priming of Dppa2/4-dependent genes is able to occur as normal in wild type cells and indeed this does result in faster differentiation of wild type relative to the knockout cells.

- Figure S1C – It would be informative to quantify the OCT4, NANOG and SOX2 signal. While we agree that the fluorescent signal of OCT4 and SOX2 appears to be similar between WT and DKO ESCs (in agreement with the RT-qPCR), NANOG seems a bit reduced in the DKO cells (in agreement with the RT-qPCR for NANOG, which might also extrapolate to all naïve markers). This is important as the absence of DPPA2/4 might result in a slight downregulation of naïve markers, which would extend on the manuscript title that *dppa2/4* lead to not only epigenetic priming, but maybe in general priming of ESCs.

The reviewer is correct that we see subtle differences in the levels of Nanog by RNA-seq but these are not statistically significant. We are hesitant to quantify the images we present in Figure S1C as we don't feel that there are enough cells present in these to be fully representative of the population, and we are currently unable to return to the lab to acquire additional images. We have previously quantified the protein levels of Nanog and Oct4 in *Dppa2/4* single and double knockout cells by western blot (Eckersley-Maslin *et al.*, 2018) and did not find protein levels to be substantially reduced in *Dppa2/4* knockouts [REVIEWER FIG. 1 REDACTED TO REMOVE THIRD PARTY MATERIAL; please refer to Supplemental Fig. 5B & C of Eckersley-Maslin M. *et al. Genes Dev.* **33**, 194-208 (2019)]. We agree that it would be very interesting if *Dppa2/4* regulated some aspects of general pluripotency in ESCs but feel that this effect is likely small and would be best followed up in future work.

- Line 147 / Figure S3D - For the control IgG plot, there appear to be strong outliers for all genes. Certain other ChIPs also show outliers for some genes. As such, how reliable are these results?

There are many steps in a standard ChIP-qPCR protocol which can result in slightly variable replicate data (e.g. slightly different starting cell numbers, sonication efficiency etc.) but these are more easily normalised upon sequencing. It's also worth pointing out that the scale in the IgG pulldowns is small and small differences between replicates can appear more substantial. Whilst there is some variability in the ChIP-qPCR data we find that it still validates the main observations of the sequencing data (i.e. strong loss of H3K4me3 and H3K27me3 at *Dppa*-dependent genes).

- Line 206 – This requires some nuance. While it appears that *Dppa2/4*-sensitive genes do not reach the same expression levels in the *Dppa2/4* DKO as in WT, there is a clear pattern of upregulation that mimics the WT situation. This pattern is not present for the *Dppa2/4*-dependent genes.

We agree and have edited the text so that it is clear that Dppa2/4-sensitive genes are still upregulated but to a lesser degree in Dppa2/4 knockout cells relative to WT cells.

- Line 842 – The methods section regarding the machine learning is not very transparent. It also mentions training on random promoters, however no data regarding outcomes of this can be found in the manuscript.

A set of random promoters was used to evaluate the performance of the classifier, rather than training a model on a random set of promoters. Performance evaluations are shown above the heatmaps in Figure 3A/B. We have restructured the methods section to clarify this and to make the method more transparent and understandable.

- Line 875 / Figure S1B – Are the expression levels shown for WT and Dppa2/4 DKO cells averaged over all three clones, or from one clone that is representative for all three. This is unclear from the legend.

This RNA-seq data shows the average Log2 RPM value +/- SD of the three clones. We have now made this clear in the legend.

- Line 143 – In figure 2D, Ring1B and Ezh2 appear to be increased for Dppa2/4-sensitive promoters, as opposed to unaltered. Please address this.

This appears to be true and indeed the same is shown in Fig. S3C. The exact mechanism that causes Ring1B and Ezh2 to accumulate at Dppa2/4-sensitive promoters is not clear. One possibility is that upon DNA methylation of Dppa2/4-dependent promoters the polycomb machinery is redistributed to other promoters including Dppa2/4-sensitive ones. This is consistent with the literature which shows that polycomb components are generally recruited to unmethylated CpGs and are blocked by methylation (Cooper et al., 2014; Reddington et al., 2013). We have altered the text at line 143 to highlight that Ring1B and Ezh2 levels are slightly increased at sensitive genes and included this potential explanation.

The following smaller points have also been altered/ incorporated in the figures and text as suggested by the reviewer:

- Line 18/19 – Please specify the organism used in this study earlier on. It is not mentioned until the methods section which model organism is used.
- Line 67 – Please indicate that these are Dppa2/4 DKO cells.
- Line 100 – Please change this to “Fig 1F-G”.
- Line 114 – Please change Wrd5 to Wdr5
- Figure 2D – Indicate peak numbers in figure as peak numbers in figure 2C are very small
- Line 958 / Figure S5A – Please include an extra panel of box-whisker plots showing only Dppa2/4-sensitive genes.
- Line 983 / Figure S6A – Quantify the western blot signal relative to the housekeeping signal.

#### Reviewer #2 (Remarks to the Author):

The authors addressed most of the issues raised in the original review. Although there are some issues that could have been improved, and it is not entirely clear how much the new shRNA experiments are adding to the paper and to address the original 'novelty' question, the paper has been substantially improved and merits publication. With everything that's going on in the world at this point, I would refrain from sending the authors back to the bench for additional minor edits, and I would recommend publishing the paper at its current form.

We thank Reviewer 2 for their kind words.

#### **References**

- Cooper, S., Dienstbier, M., Hassan, R., Schermelleh, L., Sharif, J., Blackledge, N. P., DeMarco, V., Elderkin, S., Koseki, H., Klose, R., Heger, A., & Brockdorff, N. (2014). Targeting Polycomb to Pericentric Heterochromatin in Embryonic Stem Cells Reveals a Role for H2AK119u1 in PRC2 Recruitment. *Cell Reports*, 7(5), 1456–1470. <https://doi.org/10.1016/j.celrep.2014.04.012>
- Reddington, J. P., Perricone, S. M., Nestor, C. E., Reichmann, J., Youngson, N. A., Suzuki, M., Reinhardt, D., Dunican, D. S., Prendergast, J. G., Mjoseng, H., Ramsahoye, B. H., Whitelaw, E., Grealley, J. M., Adams, I. R., Bickmore, W. A., & Meehan, R. R. (2013). Redistribution of H3K27me3 upon DNA hypomethylation results in de-repression of Polycomb target genes. *Genome Biology*, 14(3). <https://doi.org/10.1186/gb-2013-14-3-r25>

**Decision Letter, second revision:**

6th Apr 2020

Dear Wolf,

Thank you again for submitting your manuscript "Epigenetic priming by Dppa2/4 in pluripotency facilitates multi-lineage commitment" and for providing a response to the remaining points of reviewer #1.

Based on this information, we are happy to accept your paper, in principle, for publication as an Article in Nature Structural & Molecular Biology, on the condition that you revise your manuscript in response to the comments of the referee and to our editorial requirements.

Please follow the instructions provided here and in the attached files, as the formal acceptance of your manuscript will be delayed if these issues are not addressed.

When you upload your final materials, please include a concise point-by-point response to the points below.

**SCIENTIFIC ISSUES**

1. The remaining concerns of referee #1 need to be addressed as outlined in your point-by-point response to these concerns.

**POLICY ISSUES**

2. **DATA AVAILABILITY:** this journal strongly supports public availability of data. Please place the data used in your paper into a public data repository, or alternatively, present the data as supplementary information. If data can only be shared on request, please explain why in your Data Availability Statement, and also in the correspondence with your editor. Please note that for some data types, deposition in a public repository is mandatory (please see Pt. 3 below).

3. **DATA DEPOSITION:** Deposition of deep sequencing is mandatory, and the datasets must be released prior to or upon publication. Proteomic datasets should be deposited in PRIDE. Accession codes must be provided in your final submission for acceptance, and entries must be accessible at the galley proof stage.

4. Nature Research is taking an active approach to improving our transparency standards and increasing the reproducibility of all of our published results. Detailed information on experimental design and reagents is now collected on our Life Sciences Reporting Summary, which will be published alongside your paper. Please provide an updated version of the Reporting Summary (which will be published with the paper) with your final files.

<https://www.nature.com/authors/policies/ReportingSummary.pdf>

Please also upload a revised Editorial policy checklist.

<https://www.nature.com/authors/policies/Policy.pdf>

#### GENERAL FORMATTING

5. Please reduce the abstract to 150 words, while retaining the information regarding the species of origin of the system being studied.
6. Please make sure all references are cited in numerical order and place Methods-only references after the Methods section, following the numbering of the main reference list (i.e. do not start at 1).
7. The reference list should contain papers that have been published or accepted by a named publication or recognized preprint server. Published conference abstracts, numbered patents and research datasets that have been assigned a digital object identifier may also be included in the reference list.
8. Please avoid using slashes as e.g. in Dppa2/4. Slashes are OK in ratios and units, genotypes, sequence motifs, and cotransport. Replace with parentheses (e.g., for homologs and alternate names), "and," "or," or hyphen as applicable; use en dashes to separate components of a complex.

#### FIGURES AND TABLES

9. Please make sure all figures and tables, including Extended Data Figures, are cited in the text in numerical order.
10. Cropping of gel and/or blot images: gel pieces should be separated with white space (do not add borders). When cropped gels or blots are shown in the main figures, all key data should be presented in uncropped form with molecular weight markers, as Source Data, as instructed below. These data can be displayed in a relatively informal style, but must refer back to the relevant figures; figure legend text should refer to the uncropped image and cite the Source Data (e.g., Uncropped blot/gel images are shown in the Source Data”).

#### SUPPLEMENTARY INFORMATION

All Supplementary Information must be submitted in accordance with the instructions in the attached Inventory of Supporting Information, and should fit into one of three categories:

1. **EXTENDED DATA FIGURES:** Extended Data Figures are an integral part of the paper and only data that directly contribute to the main message should be presented. These figures will be integrated into the full-text HTML version of your paper and will be appended to the online PDF. There is a limit of 10 Extended Data Figures, and each must be referred to in the main text. Each Extended Data Figure should be of the same quality as the main figures, and should be supplied at a size that will allow both the figure and legend to be presented on a single legal-sized page. Each figure should be submitted as

an individual .jpg, .tif or .eps file with a maximum size of 10 MB each. All Extended Data figure legends must be provided in the attached Inventory of Accessory Information, not in the figure files themselves.

All Extended Data Figure must be called out in order as Extended Data Fig. 1, Extended Data Fig 2, etc.

2. SUPPLEMENTARY INFORMATION: Supplementary Information is material that is essential background to the study but which is not practical to include in the printed version of the paper (for example, large figures, video files, large data sets and calculations). Each item must be referred to in the main manuscript and detailed in the attached Inventory of Accessory Information. Supplementary Tables containing large data sets should be in Excel format, with the table number and title included within the body of the table. All textual information should be provided as a single, combined PDF. Please note that we cannot accept resupplies of Supplementary Information after the paper has been formally accepted unless there has been a critical scientific error.

Supplementary items (such as Supplementary Tables, Videos, Notes, and additional Supplementary Figures if permitted), should be numbered and called out in main article, as Supplementary Figure 1 (not SI1) and so on.

3. SOURCE DATA: We encourage you to provide source data for your figures. Full-length, unprocessed gels and blots must be provided as source data for any relevant figures, and should be provided as individual PDF files for each figure containing all supporting blots and/or gels with the linked figure noted directly in the file. Statistical source data (i.e., data behind graphs, here, e.g. for 3d, e, g, 4a, d, e, 5g) should be provided in Excel format, one file for each relevant figure, with the linked figure noted directly in the file.

Source data should be cited in the legend text (e.g., "Uncropped images for panels a-c are available as source data" or "Data for graphs in d-f are available as source data").

## STATISTICS & REPRODUCIBILITY

11. Wherever statistics have been derived (e.g. error bars, box plots, statistical significance), the legend needs to provide and define the n number (i.e. the sample size used to derive statistics) as a precise value (not a range), using the wording "n=X biologically independent samples/cell cultures/animals/independent experiments" etc. as applicable. All error bars need to be defined (e.g., s.d. or s.e.m.) together with a measure of center (e.g., mean or median) and should be accompanied by their precise n number, defined as noted above.

12. All box plots need to be defined in terms of minima, maxima, center, and percentiles, and should be accompanied by their precise n number defined as noted above.

13. Wherever statistical significance has been derived, precise P values should be provided if possible and appropriate. The type of statistical test used needs to be defined in the legend, whether they were one-sided or two-sided or whether adjustments were made for multiple comparisons.

14. When representative experiments are shown, you should state in the legends how many times each experiment was repeated independently with similar results. Please indicate number of times

experiments were repeated, number of images collected, etc. If space in the legends is limiting, this information can be included in the "Statistics and Reproducibility" subsection in Methods.

15. If applicable, the Methods should include a statistics section, listing statistical tests used, whether the test was one- or two-tailed, exact values for both significant and non-significant P values where relevant; F values and degrees of freedom for all ANOVAs; and t-values and degrees of freedom for t-tests.

16. Cell lines: the Methods should include a section with cell lines used, origin, whether they were tested for mycoplasma and, where relevant, whether they were authenticated or not.

17. Competing interests statement: Please include a competing interests statement as a separate section after the Author Contributions, under the heading "Competing interests", and enumerate any such circumstances there, or read: The authors declare no competing interests.

18. Reporting Summary statement: This should be placed after Online Methods section and read: Further information on experimental design is available in the Nature Research Reporting Summary linked to this article.

19. Code Availability Statement: This should be placed after Reporting Summary statement.

20. Data Availability statement: This should be placed after Code Availability statement (before Methods-only references). We suggest that you list in this order:

- data deposited in public repositories, with accession codes or DOIs.
- data available as Source Data (e.g. "Source data for figure 3d, 4b and 4c are available with the paper online.")
- if any data can only be shared upon request, please specify what those data are and explain why.

More information and examples can be found at

<http://www.nature.com/authors/policies/data/data-availability-statements-data-citations.pdf>

#### TRANSPARENT PEER REVIEW

21. NSMB offers a transparent peer review option for new original research manuscripts submitted from 1st December 2019. We encourage increased transparency in peer review by publishing the reviewer comments, author rebuttal letters and editorial decision letters if the authors agree. Such peer review material is made available as a supplementary peer review file. Please state in the cover letter 'I wish to participate in transparent peer review' if you want to opt in, or 'I do not wish to participate in transparent peer review' if you don't. Failure to state your preference will result in delays in accepting your manuscript for publication.

Please note: we allow redactions to authors' rebuttal and reviewer comments in the interest of confidentiality. If you are concerned about the release of confidential data, please let us know specifically what information you would like to have removed. Please note that we cannot incorporate

redactions for any other reasons. Reviewer names will be published in the peer review files if the reviewer signed the comments to authors, or if reviewers explicitly agree to release their name. For more information, please refer to our [FAQ page](https://www.nature.com/documents/nr-transparent-peer-review.pdf).

#### AUTHORSHIP AND OTHER REQUIREMENTS

22. Ensure that all required forms found in the Policy Worksheet are uploaded to our Journal Processing system as "Supplementary Materials".

23. ORCID: NSMB is committed to improving transparency in authorship. As part of our efforts in this direction, we are now requesting that all authors identified as 'corresponding author' on published papers create and link their Open Researcher and Contributor Identifier (ORCID) with their account on the Manuscript Tracking System (MTS), prior to acceptance. ORCID helps the scientific community achieve unambiguous attribution of all scholarly contributions. For more information please visit <http://www.springernature.com/orcid>. Before resubmitting the final version of the manuscript, please follow the steps below to link your account on our MTS with your ORCID. If you don't have an ORCID yet, you will be able to create one in minutes. If you are not listed as a corresponding author, please ensure that the corresponding author(s) comply.

From the home page of the MTS ([REDACTED]) click on 'Modify my Springer Nature account' under 'General tasks'. In the 'Personal profile' tab, click on 'ORCID Create/link an Open Researcher Contributor ID(ORCID)'. This will re-direct you to the ORCID website.

If you already have an ORCID account, enter your ORCID email and password and click on 'Authorize' to link your ORCID with your account on the MTS.

If you don't yet have an ORCID, you can easily create one by providing the required information and then click on 'Authorize'. This will link your newly created ORCID with your account on the MTS.

**IMPORTANT:** All authors identified as 'corresponding authors' on the manuscript must follow these instructions. Non-corresponding authors do not have to link their ORCIDs, but please note that it will not be possible to add/modify ORCIDs at proof. Thus, if they wish to have their ORCID added to the paper, they must also follow the above procedure prior to acceptance.

To support ORCID's aims, we only allow a single ORCID identifier to be attached to one account. If you have any issues attaching an ORCID identifier to your Manuscript Tracking System account, please contact the Platform Support Helpdesk at <http://platformsupport.springernature.com>

Nature Research journals [encourage authors to share their step-by-step experimental protocols](https://www.nature.com/nature-research/editorial-policies/reporting-standards#protocols) on a protocol sharing platform of their choice. Nature Research's Protocol Exchange is a free-to-use and open resource for protocols; protocols deposited in Protocol Exchange are citable and can be linked from the published article. More details can found at [www.nature.com/protocolexchange/about](https://www.nature.com/protocolexchange/about).

In addition to addressing these points, please refer to the attached policy and rights worksheet, which contains information on how to comply with our legal guidelines for publication and describes the files that you will need to upload prior to final acceptance. You must initial the relevant portions of this checklist, sign it and return it with your final files. I have also attached a formatting guide for you to consult as you prepare the revised manuscript. Careful attention to this guide will ensure that the production process for your paper is more efficient.

Please use the following link for uploading these materials:

[REDACTED]

We ask that you aim to return your revised paper within 7-10 days, although we will of course be flexible regarding the timeline. If you have any further questions, please feel free to contact me.

Best regards,  
Anke

Anke Sparmann, PhD  
Senior Editor  
Nature Structural and Molecular Biology  
ORCID 0000-0001-7695-2049

Reviewer #1 (Remarks to the Author):

The manuscript entitled "Epigenetic priming by Dppa2/4 in pluripotency facilitates multi-lineage commitment" by Eckersley-Maslin et al. demonstrates a role for Dppa2/4 (Developmental Pluripotency Associated 2/4) in establishing bivalency at select developmental genes. The authors show that removal of Dppa2/4 disturbs differentiation and results in a loss of bivalency at adequately termed "Dppa2/4-dependent" promoters, which are characterized by a reduced presence of H3K4me3 and low expression levels. This manuscript presents novel insights into chromatin biology and the results are very convincing. In addition, a large share of the observations of the authors are confirmed in an independent publication recently deposited on BiorXiv (<https://www.biorxiv.org/content/10.1101/2020.03.11.987701v1.full>). We provide a few suggestions that might further improve the manuscript.

General comment:

While the authors uncover a group of bivalent promoters that are sensitive to but not dependent on Dppa2/4, mechanistic insights into the biology of these promoters remains relatively unaddressed. This group of bivalent promoters appears to classify between Dppa2/4-dependent and -independent promoters, with regard to their biological behavior. It would be informative if the authors would explore or describe potential mechanisms underlying this distinction. This might be relevant given the fact that the machine learning algorithm presented in Figure 3 seems unable to accurately classify these promoters.

## Minor comments:

- In general, wouldn't (epigenetic) priming result in faster, rather than slower, differentiation, of Dppa2/4 DKO ESCs? It might be useful if the authors could comment on this.
- Figure S1C – It would be informative to quantify the OCT4, NANOG and SOX2 signal. While we agree that the fluorescent signal of OCT4 and SOX2 appears to be similar between WT and DKO ESCs (in agreement with the RT-qPCR), NANOG seems a bit reduced in the DKO cells (in agreement with the RT-qPCR for NANOG, which might also extrapolate to all naïve markers). This is important as the absence of DPPA2/4 might result in a slight downregulation of naïve markers, which would extend on the manuscript title that dppa2/4 lead to not only epigenetic priming, but maybe in general priming of ESCs.
- Line 18/19 – Please specify the organism used in this study earlier on. It is not mentioned until the methods section which model organism is used.
- Line 67 – Please indicate that these are Dppa2/4 DKO cells.
- Line 100 – Please change this to “Fig 1F-G”.
- Line 114 – Please change Wrd5 to Wdr5
- Line 143 – In figure 2D, Ring1B and Ezh2 appear to be increased for Dppa2/4-sensitive promoters, as opposed to unaltered. Please address this.
- Figure 2D – Indicate peak numbers in figure as peak numbers in figure 2C are very small
- Line 147 / Figure S3D - For the control IgG plot, there appear to be strong outliers for all genes. Certain other ChIPs also show outliers for some genes. As such, how reliable are these results?
- Line 206 – This requires some nuance. While it appears that Dppa2/4-sensitive genes do not reach the same expression levels in the Dppa2/4 DKO as in WT, there is a clear pattern of upregulation that mimics the WT situation. This pattern is not present for the Dppa2/4-dependent genes.
- Line 842 – The methods section regarding the machine learning is not very transparent. It also mentions training on random promoters, however no data regarding outcomes of this can be found in the manuscript.
- Line 875 / Figure S1B – Are the expression levels shown for WT and Dppa2/4 DKO cells averaged over all three clones, or from one clone that is representative for all three. This is unclear from the legend.
- Line 958 / Figure S5A – Please include an extra panel of box-whisker plots showing only Dppa2/4-sensitive genes.
- Line 983 / Figure S6A – Quantify the western blot signal relative to the housekeeping signal.

## Reviewer #2 (Remarks to the Author):

The authors addressed most of the issues raised in the original review. Although there are some issues that could have been improved, and it is not entirely clear how much the new shRNA experiments are adding to the paper and to address the original 'novelty' question, the paper has been substantially improved and merits publication. With everything that's going on in the world at this point, I would refrain from sending the authors back to the bench for additional minor edits, and I would recommend publishing the paper at its current form.

**Author Rebuttal, second revision:****Point-by-point response to editorial and reviewer points**

## SCIENTIFIC ISSUES

1. The remaining concerns of referee #1 need to be addressed as outlined in your point-by-point response to these concerns.

The remaining concerns have been addressed as in our previous point-by-point response. Changes made are highlighted in red text.

## POLICY ISSUES

2. DATA AVAILABILITY: this journal strongly supports public availability of data. Please place the data used in your paper into a public data repository, or alternatively, present the data as supplementary information. If data can only be shared on request, please explain why in your Data Availability Statement, and also in the correspondence with your editor. Please note that for some data types, deposition in a public repository is mandatory (please see Pt. 3 below).

Sequencing and proteomics data have been deposited on GEO and PRIDE respectively and details have been provided in a Data Availability Statement.

3. DATA DEPOSITION: Deposition of deep sequencing is mandatory, and the datasets must be released prior to or upon publication. Proteomic datasets should be deposited in PRIDE. Accession codes must be provided in your final submission for acceptance, and entries must be accessible at the galley proof stage.

Sequencing and proteomics data have been deposited on GEO and PRIDE respectively and details have been provided in a Data Availability Statement. These will be made publicly available at the proof stage as required.

4. Nature Research is taking an active approach to improving our transparency standards and increasing the reproducibility of all of our published results. Detailed information on experimental design and reagents is now collected on our Life Sciences Reporting Summary, which will be published alongside your paper. Please provide an updated version of the Reporting Summary (which will be published with the paper) with your final files.

<https://www.nature.com/authors/policies/ReportingSummary.pdf>

Please also upload a revised Editorial policy checklist.

<https://www.nature.com/authors/policies/Policy.pdf>

We have completed the above and will upload these together with our manuscript.

#### GENERAL FORMATTING

5. Please reduce the abstract to 150 words, while retaining the information regarding the species of origin of the system being studied.

Our abstract has been reduced to 150 words.

6. Please make sure all references are cited in numerical order and place Methods-only references after the Methods section, following the numbering of the main reference list (i.e. do not start at 1).

Citations are in numerical order and methods-only references have been moved after the methods section.

7. The reference list should contain papers that have been published or accepted by a named publication or recognized preprint server. Published conference abstracts, numbered patents and research datasets that have been assigned a digital object identifier may also be included in the reference list.

References are as required.

8. Please avoid using slashes as e.g. in Dppa2/4. Slashes are OK in ratios and units, genotypes, sequence motifs, and cotransport. Replace with parentheses (e.g., for homologs and alternate names), "and," "or," or hyphen as applicable; use en dashes to separate components of a complex.

Slashes have been replaced by commas when referring to both Dppa2 and Dppa4.

#### FIGURES AND TABLES

9. Please make sure all figures and tables, including Extended Data Figures, are cited in the text in numerical order.

Figures and tables are cited in numerical order.

10. Cropping of gel and/or blot images: gel pieces should be separated with white space (do not add borders). When cropped gels or blots are shown in the main figures, all key data should be presented in uncropped form with molecular weight markers, as Source Data, as instructed below. These data can be displayed in a relatively informal style, but must refer back to the relevant figures; figure legend text should refer to the uncropped image and cite the Source Data (e.g., Uncropped blot/gel images are shown in the Source Data”.

Borders have been removed from western blot images. Uncropped blots have been provided as Source Data for Fig. 5b and this is referred to in the figure legend.

#### SUPPLEMENTARY INFORMATION

All Supplementary Information must be submitted in accordance with the instructions in the attached Inventory of Supporting Information, and should fit into one of three categories:

1. EXTENDED DATA FIGURES: Extended Data Figures are an integral part of the paper and only data that directly contribute to the main message should be presented. These figures will be integrated into the full-text HTML version of your paper and will be appended to the online PDF. There is a limit of 10 Extended Data Figures, and each must be referred to in the main text. Each Extended Data Figure should be of the same quality as the main figures, and should be supplied at a size that will allow both the figure and legend to be presented on a single legal-sized page. Each figure should be submitted as an individual .jpg, .tif or .eps file with a maximum size of 10 MB each. All Extended Data figure legends must be provided in the attached Inventory of Accessory Information, not in the figure files themselves. All Extended Data Figure must be called out in order as Extended Data Fig. 1, Extended Data Fig 2, etc.

Extended data figures are provided as individual .jpg files and are detailed in the Inventory of Accessory Information form.

2. SUPPLEMENTARY INFORMATION: Supplementary Information is material that is essential background to the study but which is not practical to include in the printed version of the paper (for example, large figures, video files, large data sets and calculations). Each item must be referred to in the main manuscript and detailed in the attached Inventory of Accessory Information. Supplementary Tables containing large data sets should be in Excel format, with the table number and title included within the body of the table. All textual information should be provided as a single, combined PDF. Please note that

we cannot accept resubmissions of Supplementary Information after the paper has been formally accepted unless there has been a critical scientific error.

Supplementary items (such as Supplementary Tables, Videos, Notes, and additional Supplementary Figures if permitted), should be numbered and called out in main article, as Supplementary Figure 1 (not S11) and so on.

Supplementary tables are provided as individual Excel files.

3. SOURCE DATA: We encourage you to provide source data for your figures. Full-length, unprocessed gels and blots must be provided as source data for any relevant figures, and should be provided as individual PDF files for each figure containing all supporting blots and/or gels with the linked figure noted directly in the file. Statistical source data (i.e., data behind graphs, here, e.g. for 3d, e, g, 4a, d, e, 5g) should be provided in Excel format, one file for each relevant figure, with the linked figure noted directly in the file.

Source data should be cited in the legend text (e.g., “Uncropped images for panels a-c are available as source data” or “Data for graphs in d-f are available as source data”).

Uncropped blots have been provided as Source Data for Fig. 5b and this is referred to in the figure legend.

#### STATISTICS & REPRODUCIBILITY

11. Wherever statistics have been derived (e.g. error bars, box plots, statistical significance), the legend needs to provide and define the n number (i.e. the sample size used to derive statistics) as a precise value (not a range), using the wording “n=X biologically independent samples/cell cultures/animals/independent experiments” etc. as applicable. All error bars need to be defined (e.g., s.d. or s.e.m.) together with a measure of center (e.g., mean or median) and should be accompanied by their precise n number, defined as noted above.

Legends define the number of replicates (n) and error bars.

12. All box plots need to be defined in terms of minima, maxima, center, and percentiles, and should be accompanied by their precise n number defined as noted above.

Figure legends now explain the centre, maxima and minima of box plots.

13. Wherever statistical significance has been derived, precise P values should be provided if possible and appropriate. The type of statistical test used needs to be defined in the legend, whether they were one-sided or two-sided or whether adjustments were made for multiple comparisons.

Precise p-values are provided where statistical tests were performed and data found to be significant (<0.05) or close to this value (e.g. Extended Fig. 3d)

14. When representative experiments are shown, you should state in the legends how many times each experiment was repeated independently with similar results. Please indicate number of times experiments were repeated, number of images collected, etc. If space in the legends is limiting, this information can be included in the “Statistics and Reproducibility” subsection in Methods.

No such representative experiments are shown.

15. If applicable, the Methods should include a statistics section, listing statistical tests used, whether the test was one- or two-tailed, exact values for both significant and non-significant P values where relevant; F values and degrees of freedom for all ANOVAs; and t-values and degrees of freedom for t-tests.

Details on statistical tests performed are provided in appropriate figure legends.

16. Cell lines: the Methods should include a section with cell lines used, origin, whether they were tested for mycoplasma and, where relevant, whether they were authenticated or not.

These details are now included in the ‘cell culture and flow cytometry’ section of the methods.

17. Competing interests statement: Please include a competing interests statement as a separate section after the Author Contributions, under the heading “Competing interests”, and enumerate any such circumstances there, or read: The authors declare no competing interests.

A competing interest’s statement is now included.

18. Reporting Summary statement: This should be placed after Online Methods section and read: Further information on experimental design is available in the Nature Research Reporting Summary linked to this article.

A reporting summary statement is included.

19. Code Availability Statement: This should be placed after Reporting Summary statement.

No novel code is shared but software used are detailed in the methods section.

20. Data Availability statement: This should be placed after Code Availability statement (before Methods-only references). We suggest that you list in this order:

- data deposited in public repositories, with accession codes or DOIs.
- data available as Source Data (e.g. "Source data for figure 3d, 4b and 4c are available with the paper online.")
- if any data can only be shared upon request, please specify what those data are and explain why.

More information and examples can be found at

<http://www.nature.com/authors/policies/data/data-availability-statements-data-citations.pdf>

A data availability section is included and provides the above information.

#### TRANSPARENT PEER REVIEW

21. NSMB offers a transparent peer review option for new original research manuscripts submitted from 1st December 2019. We encourage increased transparency in peer review by publishing the reviewer comments, author rebuttal letters and editorial decision letters if the authors agree. Such peer review material is made available as a supplementary peer review file. Please state in the cover letter 'I wish to participate in transparent peer review' if you want to opt in, or 'I do not wish to participate in transparent peer review' if you don't. Failure to state your preference will result in delays in accepting your manuscript for publication.

Please note: we allow redactions to authors' rebuttal and reviewer comments in the interest of confidentiality. If you are concerned about the release of confidential data, please let us know

specifically what information you would like to have removed. Please note that we cannot incorporate redactions for any other reasons. Reviewer names will be published in the peer review files if the reviewer signed the comments to authors, or if reviewers explicitly agree to release their name. For more information, please refer to our [FAQ page](#).

We wish to participate in transparent peer review.

#### AUTHORSHIP AND OTHER REQUIREMENTS

22. Ensure that all required forms found in the Policy Worksheet are uploaded to our Journal Processing system as “Supplementary Materials”.

Forms detailed in the Policy Worksheet have been uploaded as supplementary materials.

23. ORCID: NSMB is committed to improving transparency in authorship. As part of our efforts in this direction, we are now requesting that all authors identified as ‘corresponding author’ on published papers create and link their Open Researcher and Contributor Identifier (ORCID) with their account on the Manuscript Tracking System (MTS), prior to acceptance. ORCID helps the scientific community achieve unambiguous attribution of all scholarly contributions. For more information please visit <http://www.springernature.com/orcid> . Before resubmitting the final version of the manuscript, please follow the steps below to link your account on our MTS with your ORCID. If you don’t have an ORCID yet, you will be able to create one in minutes. If you are not listed as a corresponding author, please ensure that the corresponding author(s) comply.

From the home page of the MTS ([\[REDACTED\]](#)) click on ‘Modify my Springer Nature account’ under ‘General tasks’. In the ‘Personal profile’ tab, click on ‘ORCID Create/link an Open Researcher Contributor ID(ORCID)’. This will re-direct you to the ORCID website.

If you already have an ORCID account, enter your ORCID email and password and click on ‘Authorize’ to link your ORCID with your account on the MTS.

If you don’t yet have an ORCID, you can easily create one by providing the required information and then click on ‘Authorize’. This will link your newly created ORCID with your account on the MTS.

ORCID accounts have been linked to the Springer Nature accounts of corresponding authors.

**Final Decision Letter:**

28th Apr 2020

Dear Wolf,

We are now happy to accept your revised paper "Epigenetic priming by Dppa2/4 in pluripotency facilitates multi-lineage commitment" for publication as a Article in Nature Structural & Molecular Biology.

Acceptance is conditional on the manuscript's not being published elsewhere and on there being no announcement of this work to the newspapers, magazines, radio or television until the publication date in Nature Structural & Molecular Biology.

Before the manuscript is sent to the printers, we shall make any detailed changes in the text that may be necessary either to make it conform with house style or to make it intelligible to a wider readership. If the changes are extensive, we will ask for your approval before the manuscript is laid out for production. Once your manuscript is typeset you will receive a link to your electronic proof via email within 20 working days, with a request to make any corrections within 48 hours. Please read proofs with great care to make sure that the sense has not been altered. If you have queries at any point during the production process then please contact the production team at [rjsproduction@springernature.com](mailto:rjsproduction@springernature.com). Once your paper has been scheduled for online publication, the Nature press office will be in touch to confirm the details.

Please note that due to tight production schedules, proofs should be returned as quickly as possible to avoid delaying publication. If you anticipate any limitations to your availability over the next 2-4 weeks (such as vacation or traveling to conferences, etc.), please e-mail [rjsproduction@springernature.com](mailto:rjsproduction@springernature.com) as soon as possible. Please provide specific dates that you will be unavailable and provide detailed contact information for an alternate corresponding author if necessary.

To assist our authors in disseminating their research to the broader community, our SharedIt initiative provides all co-authors with the ability to generate a unique shareable link that will allow anyone (with or without a subscription) to read the published article. Recipients of the link with a subscription will also be able to download and print the PDF.

As soon as your article is published, you can generate your shareable link by entering the DOI of your article here: <http://authors.springernature.com/share>. Corresponding authors will also receive an automated email with the shareable link

Note the policy of the journal on data deposition:  
<http://www.nature.com/authors/policies/availability.html>.

Your paper will be published online soon after we receive proof corrections and will appear in print in the next available issue. You can find out your date of online publication by contacting the production team shortly after sending your proof corrections. The embargo is set at 16:00 London time (GMT) /

11:00 am US Eastern time (EST), on the Monday of publication. Now is the time to inform your Public Relations or Press Office about your paper, as they might be interested in promoting its publication. This will allow them time to prepare an accurate and satisfactory press release. Include your manuscript tracking number (NSMB-A42760B) and our journal name, which they will need when they contact our press office.

About one week before your paper is published online, we shall be distributing a press release to news organizations worldwide, which may very well include details of your work. We are happy for your institution or funding agency to prepare its own press release, but it must mention the embargo date and Nature Structural & Molecular Biology. If you or your Press Office have any enquiries in the meantime, please contact [press@nature.com](mailto:press@nature.com).

You can now use a single sign-on for all your accounts, view the status of all your manuscript submissions and reviews, access usage statistics for your published articles and download a record of your refereeing activity for the Nature journals.

If you have not already done so, we strongly recommend that you upload the step-by-step protocols used in this manuscript to the Protocol Exchange. Protocol Exchange is an open online resource that allows researchers to share their detailed experimental know-how. All uploaded protocols are made freely available, assigned DOIs for ease of citation and fully searchable through [nature.com](http://nature.com). Protocols can be linked to any publications in which they are used and will be linked to from your article. You can also establish a dedicated page to collect all your lab Protocols. By uploading your Protocols to Protocol Exchange, you are enabling researchers to more readily reproduce or adapt the methodology you use, as well as increasing the visibility of your protocols and papers. Upload your Protocols at [www.nature.com/protocolexchange/](http://www.nature.com/protocolexchange/). Further information can be found at [www.nature.com/protocolexchange/about](http://www.nature.com/protocolexchange/about).

An online order form for reprints of your paper is available at <https://www.nature.com/reprints/author-reprints.html>. Please let your coauthors and your institutions' public affairs office know that they are also welcome to order reprints by this method.

Please note that we encourage the authors to self-archive their manuscript (the accepted version before copy editing) in their institutional repository, and in their funders' archives, six months after publication. Nature Research Group recognizes the efforts of funding bodies to increase access of the research they fund, and strongly encourages authors to participate in such efforts. For information about our editorial policy, including license agreement and author copyright, please visit [www.nature.com/nsmb/about/ed\\_policies/index.html](http://www.nature.com/nsmb/about/ed_policies/index.html)

The Author's Accepted Manuscript (the accepted version of the manuscript as submitted by the author) may only be posted 6 months after the paper is published, consistent with our [self-archiving embargo](http://www.nature.com/authors/policies/license.html). Please note that the Author's Accepted Manuscript may not be released under a Creative Commons license. For Nature Research Terms of Reuse of archived manuscripts please see: <http://www.nature.com/authors/policies/license.html#terms>

If you have posted a preprint on any preprint server, please ensure that the preprint details are

updated with a publication reference, including the DOI and a URL to the published version of the article on the journal website.

With kind regards,  
Anke

Anke Sparmann, PhD  
Senior Editor  
Nature Structural and Molecular Biology  
ORCID 0000-0001-7695-2049

Click here if you would like to recommend Nature Structural & Molecular Biology to your librarian:  
<http://www.nature.com/subscriptions/recommend.html#forms>
