# Supplementary material for: Epigenetic priming by Dppa2 and 4 in pluripotency facilitates multi-lineage commitment
Source: Springer Nature journal article supplement (doi:10.1038/s41594-020-0443-3), 2020-06-22

Uncropped Immunoblots related to Figure 5B

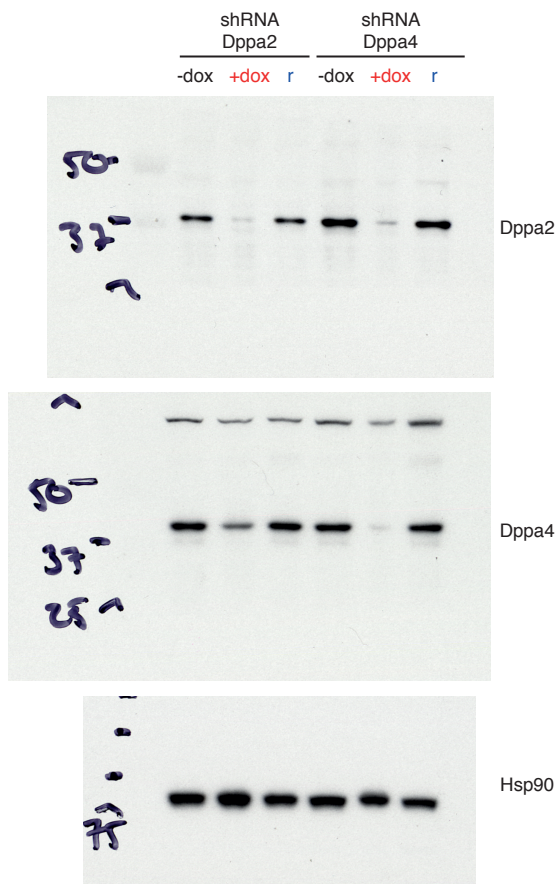

Supplement: 41594_2020_443_MOESM10_ESM.pdf [file 41594_2020_443_MOESM10_ESM.pdf]
